# Supplementary material for: The potency of minerals to reduce oriental fruit fly infestation in chili fruits
Source: PeerJ. 2022 Apr 14;10:e13198. doi: 10.7717/peerj.13198 (PMC9013478; doi:10.7717/peerj.13198)
Supplement: Supplemental Information 1 [file peerj-10-13198-s001.xlsx]

## Sheet: Visit
	Average number of fruit fly visits on chili fruits
	Treatments	Average Visits (Flies)								Treatments	Replication	Number of Fruit Fly Visits on Chili fruits during 240 minutes of Observation (flies)																	Total	Rata-Rata
		Rep 1	Rep 2	Rep 3	Rep 4	Means	SD	SE				1	15	30	45	60	75	90	105	120	135	150	165	180	195	210	225	240
	Kaolin	1.06	1.35	2.06	2.06	1.6325	0.507633	0.253817		Kaolin	1	1	1	4	1	2	2	0	1	0	0	1	1	0	1	0	1	2	18	1.05882
	Talc	1.06	0.59	0.94	2.41	1.25	0.798624	0.399312		Talc		0	1	0	2	0	3	3	1	2	1	1	1	0	2	1	0	0	18	1.05882
	Zinc Oxide	2	2.12	2.53	2.35	2.25	0.236502	0.118251		Zinc Oxide		1	2	6	4	0	3	3	3	3	0	1	2	1	1	1	1	2	34	2
	Bentonite	0.88	1.88	1.94	2.65	1.8375	0.727845	0.363922		Bentonite		1	1	0	0	2	3	0	1	1	0	1	2	0	0	0	2	1	15	0.882353
	Sulfur	3.12	1.76	2.47	2.94	2.5725	0.607035	0.303518		Sulfur		2	3	5	3	1	8	5	6	5	2	2	2	1	2	3	0	3	53	3.11765
	Dolomite	1.18	1.65	3.53	3.06	2.355	1.11882	0.559412		Dolomite		0	2	0	0	1	2	2	1	2	1	1	2	3	2	0	0	1	20	1.17647
	Calcium Oxide	1.71	0.12	0.88	3	1.4275	1.23314	0.616568		Calcium Oxide		1	1	0	2	2	3	3	1	1	1	2	2	2	2	1	2	3	29	1.70588
	Calcium Hydroxide	2.12	2.59	1.65	2.82	2.295	0.519391	0.259695		Calcium Hydroxide		2	1	4	1	3	2	3	0	1	1	3	4	4	1	1	2	3	36	2.11765
	Calcium Carbonate	2.88	1.12	2.41	2.76	2.2925	0.806696	0.403348		Calcium Carbonate		2	2	4	4	3	4	3	4	2	3	4	3	3	2	2	1	3	49	2.88235
	Zeolite	5.76	1.18	2.53	3	3.1175	1.92316	0.961582		Zeolite		3	2	3	8	6	5	4	7	10	8	6	7	9	4	7	5	4	98	5.76471
	Control	4.12	3	5.24	4.53	4.2225	0.937172	0.468586		Control		3	3	4	6	7	8	7	4	2	2	5	3	3	3	4	3	3	70	4.11765
										Kaolin	2	1	0	1	0	0	0	3	1	1	2	2	1	2	2	1	4	2	23	1.35294
										Talc		0	0	0	0	1	0	0	0	1	1	0	0	2	2	1	1	1	10	0.588235
										Zinc Oxide		0	0	1	2	2	2	0	1	2	3	3	3	4	4	3	3	3	36	2.11765
										Bentonite		0	1	2	0	1	5	2	2	1	2	2	1	4	4	1	1	3	32	1.88235
										Sulfur		1	1	1	1	1	1	0	1	2	3	1	1	3	2	3	4	4	30	1.76471
										Dolomite		1	2	2	1	2	0	2	1	1	1	1	5	2	1	3	1	2	28	1.64706
										Calcium Oxide		0	0	0	0	0	0	0	0	0	0	0	0	0	0	0	1	1	2	0.117647
										Calcium Hydroxide		1	0	2	0	2	2	2	3	1	3	3	4	4	4	5	5	3	44	2.58824
										Calcium Carbonate		0	1	0	2	1	1	1	0	1	0	2	1	1	3	1	2	2	19	1.11765
										Zeolite		1	1	0	1	1	1	2	1	0	1	2	1	1	1	4	1	1	20	1.17647
										Control		1	1	1	2	2	3	3	4	3	5	2	4	4	3	5	4	4	51	3
										Kaolin	3	0	1	1	3	1	1	2	3	2	1	3	2	2	3	2	4	4	35	2.05882
										Talc		0	1	0	1	1	0	2	1	1	1	2	2	1	0	0	1	2	16	0.941176
										Zinc Oxide		0	2	1	2	2	2	3	2	4	2	6	4	3	2	3	3	2	43	2.52941
										Bentonite		1	0	0	2	3	0	1	1	2	1	3	5	4	2	3	2	3	33	1.94118
										Sulfur		1	2	2	1	2	3	3	3	2	3	3	3	3	3	3	2	3	42	2.47059
										Dolomite		0	2	1	1	1	2	3	1	2	4	5	4	6	7	6	8	7	60	3.52941
										Calcium Oxide		1	0	1	3	0	0	0	0	1	6	1	0	0	1	1	0	0	15	0.882353
										Calcium Hydroxide		0	0	2	1	0	0	3	3	2	0	2	1	2	2	2	3	5	28	1.64706
										Calcium Carbonate		1	6	5	3	2	2	2	1	1	3	3	2	1	2	4	2	1	41	2.41176
										Zeolite		0	1	3	3	2	1	2	2	4	1	3	2	3	4	4	5	3	43	2.52941
										Control		2	3	6	3	3	2	3	4	6	6	6	5	9	6	9	8	8	89	5.23529
										Kaolin	4	0	1	3	2	3	2	2	1	2	2	3	2	1	2	3	2	4	35	2.05882
										Talc		0	1	2	3	1	1	4	1	3	3	2	4	3	5	2	3	3	41	2.41176
										Zinc Oxide		1	0	1	2	2	3	3	2	3	3	3	1	4	4	3	3	2	40	2.35294
										Bentonite		2	1	3	4	1	3	2	3	3	3	4	2	2	3	4	3	2	45	2.64706
										Sulfur		1	1	4	3	3	2	4	4	4	2	1	4	3	4	4	3	3	50	2.94118
										Dolomite		1	3	3	2	2	3	5	5	4	3	4	2	2	2	2	5	4	52	3.05882
										Calcium Oxide		1	3	3	3	1	4	3	4	2	3	5	4	3	4	4	2	2	51	3
										Calcium Hydroxide		0	2	2	2	3	2	2	2	4	3	3	3	5	4	4	4	3	48	2.82353
										Calcium Carbonate		2	1	4	2	4	4	1	3	2	2	4	4	2	3	4	3	2	47	2.76471
										Zeolite		1	2	3	3	3	5	4	4	1	3	2	4	4	2	2	5	3	51	3
										Control		2	3	3	4	4	7	5	4	4	5	7	3	5	5	6	6	4	77	4.52941

## Sheet: Holes
	Number of oviposition holes (Punctures) on Chili Fruits
	Treatments	Number of Oviposition Holes on Chili Fruits								Treatments	Replication	Number of Oviposition Holes on Each Chili Fruit																				Total
		Rep 1	Rep 2	Rep 3	Rep 4	Means	SD	SE				1	2	3	4	5	6	7	8	9	10	11	12	13	14	15	16	17	18	19	20
	Kaolin	3	9	10	7	7.25	3.0957	1.54785		Kaolin	1	0	0	0	0	1	0	0	0	0	0	0	0	2	0	0	0	0	0	0	0	3
	Talc	2	8	3	6	4.75	2.75379	1.37689		Talc		0	1	0	0	0	0	0	0	0	0	0	0	0	1	0	0	0	0	0	0	2
	Zinc Oxide	8	5	5	6	6	1.41421	0.707107		Zinc Oxide		1	1	1	0	0	0	0	1	2	1	0	0	0	0	1	0	0	0	0	0	8
	Bentonite	6	6	5	5	5.5	0.57735	0.288675		Bentonite		0	0	0	0	0	1	0	0	1	0	0	0	1	1	1	1	0	0	0	0	6
	Sulfur	5	5	8	6	6	1.41421	0.707107		Sulfur		0	0	0	1	0	0	2	0	0	0	1	0	0	0	0	0	0	1	0	0	5
	Dolomite	6	3	6	5	5	1.41421	0.707107		Dolomite		0	0	0	1	0	0	1	0	0	0	2	0	0	1	0	0	0	0	1	0	6
	Calcium Oxide	8	5	4	4	5.25	1.89297	0.946485		Calcium Oxide		0	0	1	1	0	0	0	1	0	1	0	0	0	2	0	0	0	1	0	1	8
	Calcium Hydroxide	5	4	4	5	4.5	0.57735	0.288675		Calcium Hydroxide		1	1	0	0	1	1	0	0	0	0	0	0	0	0	0	0	0	0	0	1	5
	Calcium Carbonate	5	7	5	2	4.75	2.06155	1.03078		Calcium Carbonate		1	1	0	0	0	1	0	0	0	0	0	0	0	0	0	0	0	2	0	0	5
	Zeolite	13	7	6	3	7.25	4.19325	2.09662		Zeolite		1	1	1	0	0	1	1	0	0	0	1	1	1	1	2	1	0	1	0	0	13
	Control	17	11	12	11	12.75	2.87228	1.43614		Control		1	1	0	0	1	1	1	1	2	1	1	2	1	1	1	0	0	1	1	0	17
										Kaolin	2	1	0	0	1	1	0	0	1	1	1	0	0	2	0	0	0	1	0	0	0	9
										Talc		0	0	0	1	0	0	1	1	1	0	0	1	0	2	0	0	0	1	0	0	8
										Zinc Oxide		0	0	1	0	0	0	1	0	1	1	0	0	0	1	0	0	0	0	0	0	5
										Bentonite		0	0	1	0	0	1	1	0	0	0	0	0	2	0	0	1	0	0	0	0	6
										Sulfur		0	0	0	0	1	0	0	0	1	0	0	1	0	0	0	1	0	0	1	0	5
										Dolomite		0	0	1	0	0	0	0	0	0	2	0	0	0	0	0	0	0	0	0	0	3
										Calcium Oxide		0	1	0	0	1	0	1	1	0	0	0	0	0	0	0	0	0	1	0	0	5
										Calcium Hydroxide		0	0	0	1	0	0	0	1	0	0	0	0	0	2	0	0	0	0	0	0	4
										Calcium Carbonate		0	0	1	1	1	1	1	0	0	0	0	0	2	0	0	0	0	0	0	0	7
										Zeolite		0	1	1	0	1	0	0	2	0	0	0	1	0	0	0	0	0	1	0	0	7
										Control		1	1	0	1	0	0	1	2	0	1	2	0	0	1	0	0	1	0	0	0	11
										Kaolin	3	1	1	1	1	1	0	2	0	0	1	0	0	0	1	0	0	1	0	0	0	10
										Talc		0	0	1	0	2	0	0	0	0	0	0	0	0	0	0	0	0	0	0	0	3
										Zinc Oxide		1	0	0	1	1	0	0	2	0	0	0	0	0	0	0	0	0	0	0	0	5
										Bentonite		0	0	1	0	0	0	0	1	0	2	0	1	0	0	0	0	0	0	0	0	5
										Sulfur		0	1	1	0	1	0	0	0	1	1	0	0	1	0	2	0	0	0	0	0	8
										Dolomite		0	0	0	1	1	2	0	0	0	0	0	0	1	0	1	0	0	0	0	0	6
										Calcium Oxide		0	0	1	0	2	0	0	0	1	0	0	0	0	0	0	0	0	0	0	0	4
										Calcium Hydroxide		0	0	1	2	0	0	0	0	0	0	1	0	0	0	0	0	0	0	0	0	4
										Calcium Carbonate		0	0	1	1	0	0	1	0	0	0	0	2	0	0	0	0	0	0	0	0	5
										Zeolite		0	0	1	0	0	1	2	0	0	0	0	1	0	0	1	0	0	0	0	0	6
										Control		1	0	1	1	0	1	0	0	2	1	0	2	1	0	0	1	0	0	0	1	12
										Kaolin	4	1	0	1	1	0	0	0	1	0	0	1	0	0	1	1	0	0	0	0	0	7
										Talc		0	1	0	1	0	0	0	0	0	0	1	0	0	0	1	1	0	1	0	0	6
										Zinc Oxide		1	0	0	1	0	0	0	0	0	1	1	1	0	0	0	0	1	0	0	0	6
										Bentonite		1	0	0	1	0	0	0	0	0	1	0	0	0	1	0	0	0	0	1	0	5
										Sulfur		0	0	0	0	1	0	0	0	1	0	0	0	1	0	1	0	1	1	0	0	6
										Dolomite		1	0	0	0	0	1	0	0	0	1	0	0	1	0	0	0	0	1	0	0	5
										Calcium Oxide		1	0	0	0	1	0	0	0	0	0	0	0	0	0	0	1	0	1	0	0	4
										Calcium Hydroxide		0	0	0	0	0	1	0	0	1	0	1	0	1	0	0	1	0	0	0	0	5
										Calcium Carbonate		1	0	0	0	0	1	0	0	0	0	0	0	0	0	0	0	0	0	0	0	2
										Zeolite		1	0	0	0	0	1	0	0	0	0	0	0	0	1	0	0	0	0	0	0	3
										Control		0	0	1	1	0	0	1	1	0	1	0	1	1	1	0	1	1	0	1	0	11

## Sheet: Egg
	Number of Fruit Fly Eggs in Chili Fruits
	Treatments	Number of Laid Eggs in Chili Fruits								Treatments	Replication	Number of Eggs laid in Each Chili Fruit																				Total
		Rep 1	Rep 2	Rep 3	Rep 4	Means	SD	SE				1	2	3	4	5	6	7	8	9	10	11	12	13	14	15	16	17	18	19	20
	Kaolin	4	74	106	97	70.25	46.1763	23.0881		Kaolin	1	0	0	0	0	0	2	0	0	0	0	0	0	2	0	0	0	0	0	0	0	4
	Talc	6	80	15	96	49.25	45.3679	22.684		Talc		0	2	0	0	0	0	0	0	0	0	0	0	0	4	0	0	0	0	0	0	6
	Zinc Oxide	117	60	141	99	104.25	34.1504	17.0752		Zinc Oxide		72	4	17	2	0	0	0	11	2	6	0	0	0	0	3	0	0	0	0	0	117
	Bentonite	27	58	142	135	90.5	56.9239	28.462		Bentonite		0	0	0	0	0	2	0	0	4	0	0	0	7	3	9	2	0	0	0	0	27
	Sulfur	14	74	66	124	69.5	45.0296	22.5148		Sulfur		0	0	0	4	0	0	3	0	0	0	5	0	0	0	0	0	0	2	0	0	14
	Dolomite	88	16	174	130	102	67.2309	33.6155		Dolomite		0	0	0	74	0	0	4	0	0	0	3	0	0	5	0	0	0	0	2	0	88
	Calcium Oxide	119	47	45	93	76	36.2399	18.12		Calcium Oxide		0	0	55	3	0	0	0	3	0	4	0	0	0	47	0	0	0	2	0	5	119
	Calcium Hydroxide	37	48	50	113	62	34.477	17.2385		Calcium Hydroxide		13	2	0	0	14	5	0	0	0	0	0	0	0	0	0	0	0	0	0	3	37
	Calcium Carbonate	24	75	133	37	67.25	48.8834	24.4417		Calcium Carbonate		4	16	0	0	0	2	0	0	0	0	0	0	0	0	0	0	0	2	0	0	24
	Zeolite	218	25	80	95	104.5	81.431	40.7155		Zeolite		3	12	4	0	0	8	11	0	0	0	4	2	2	19	54	96	0	3	0	0	218
	Control	192	203	193	201	197.25	5.56028	2.78014		Control		7	6	0	0	17	12	98	3	2	3	2	4	6	2	6	0	0	18	6	0	192
										Kaolin	2	1	0	0	3	43	0	0	7	4	7	0	0	4	0	0	0	5	0	0	0	74
										Talc		0	0	0	4	0	0	8	8	14	0	0	32	0	2	0	0	0	12	0	0	80
										Zinc Oxide		0	0	5	0	0	0	37	0	7	8	0	0	0	3	0	0	0	0	0	0	60
										Bentonite		0	0	2	0	0	5	23	0	0	0	0	0	24	0	0	4	0	0	0	0	58
										Sulfur		0	0	0	0	18	0	0	0	3	0	0	32	0	0	0	9	0	0	12	0	74
										Dolomite		0	0	12	0	0	0	0	0	0	4	0	0	0	0	0	0	0	0	0	0	16
										Calcium Oxide		0	17	0	0	12	0	4	6	0	0	0	0	0	0	0	0	0	8	0	0	47
										Calcium Hydroxide		0	0	0	37	0	0	0	7	0	0	0	0	0	4	0	0	0	0	0	0	48
										Calcium Carbonate		0	0	56	4	5	2	6	0	0	0	0	0	2	0	0	0	0	0	0	0	75
										Zeolite		0	4	7	0	3	0	0	3	0	0	0	4	0	0	0	0	0	4	0	0	25
										Control		14	8	0	3	0	0	94	8	0	8	17	0	0	45	0	0	6	0	0	0	203
										Kaolin	3	17	5	5	0	22	0	2	0	0	2	0	0	0	7	0	0	46	0	0	0	106
										Talc		0	0	3	0	12	0	0	0	0	0	0	0	0	0	0	0	0	0	0	0	15
										Zinc Oxide		18	0	0	2	6	0	0	37	0	0	0	0	78	0	0	0	0	0	0	0	141
										Bentonite		0	0	32	0	0	0	0	98	0	8	0	4	0	0	0	0	0	0	0	0	142
										Sulfur		0	2	14	0	8	0	0	0	23	8	0	0	7	0	4	0	0	0	0	0	66
										Dolomite		0	0	0	107	2	8	0	0	0	0	0	0	48	0	9	0	0	0	0	0	174
										Calcium Oxide		0	0	35	0	2	0	0	0	8	0	0	0	0	0	0	0	0	0	0	0	45
										Calcium Hydroxide		0	0	12	21	0	0	0	0	0	0	17	0	0	0	0	0	0	0	0	0	50
										Calcium Carbonate		0	0	97	17	0	0	16	0	0	0	0	3	0	0	0	0	0	0	0	0	133
										Zeolite		0	0	4	0	0	12	8	0	0	0	0	49	0	0	7	0	0	0	0	0	80
										Control		2	0	4	8	0	14	0	0	2	76	0	4	64	0	0	5	0	0	0	14	193
										Kaolin	4	21	0	4	6	0	0	0	12	0	0	16	0	0	4	34	0	0	0	0	0	97
										Talc		0	12	0	21	0	0	0	0	0	0	29	0	0	0	23	7	0	4	0	0	96
										Zinc Oxide		12	0	0	2	0	0	0	0	0	24	3	15	0	0	0	0	43	0	0	0	99
										Bentonite		32	0	0	78	0	0	0	0	0	5	0	0	0	16	0	0	0	0	4	0	135
										Sulfur		0	0	0	0	23	0	0	0	3	0	0	0	4	0	3	0	53	38	0	0	124
										Dolomite		4	0	0	0	0	63	0	0	0	53	0	0	3	0	0	0	0	7	0	0	130
										Calcium Oxide		17	0	0	0	25	0	0	0	0	0	0	0	0	0	0	32	0	19	0	0	93
										Calcium Hydroxide		0	0	0	0	0	43	0	0	12	0	4	0	37	0	0	17	0	0	0	0	113
										Calcium Carbonate		5	0	0	0	0	32	0	0	0	0	0	0	0	0	0	0	0	0	0	0	37
										Zeolite		6	0	0	0	0	46	0	0	0	0	0	0	0	43	0	0	0	0	0	0	95
										Control		0	0	11	32	0	0	12	35	0	43	0	4	5	12	0	3	21	0	23	0	201

## Sheet: Infested Fruits
	Chili fruits infested by Fruit fly (%)
	Treatments	Infested Chili Fruits (%)								Treatments	Replication	Chili Fruits Infested by Fruit Fly *																				Total	% Infested Fruits
		Rep 1	Rep 2	Rep 3	Rep 4	Means	SD	SE				1	2	3	4	5	6	7	8	9	10	11	12	13	14	15	16	17	18	19	20
	Kaolin	10	40	40	35	31.25	14.3614	7.1807		Kaolin	1	0	0	0	0	0	1	0	0	0	0	0	0	1	0	0	0	0	0	0	0	2	10
	Talc	10	35	10	30	21.25	13.1498	6.57489		Talc		0	1	0	0	0	0	0	0	0	0	0	0	0	1	0	0	0	0	0	0	2	10
	Zinc Oxide	40	25	25	30	30	7.07107	3.53553		Zinc Oxide		1	1	1	1	0	0	0	1	1	1	0	0	0	0	1	0	0	0	0	0	8	40
	Bentonite	30	25	20	25	25	4.08248	2.04124		Bentonite		0	0	0	0	0	1	0	0	1	0	0	0	1	1	1	1	0	0	0	0	6	30
	Sulfur	20	25	35	30	27.5	6.45497	3.22749		Sulfur		0	0	0	1	0	0	1	0	0	0	1	0	0	0	0	0	0	1	0	0	4	20
	Dolomite	25	10	25	25	21.25	7.5	3.75		Dolomite		0	0	0	1	0	0	1	0	0	0	1	0	0	1	0	0	0	0	1	0	5	25
	Calcium Oxide	35	25	15	20	23.75	8.53913	4.26956		Calcium Oxide		0	0	1	1	0	0	0	1	0	1	0	0	0	1	0	0	0	1	0	1	7	35
	Calcium Hydroxide	25	15	15	25	20	5.7735	2.88675		Calcium Hydroxide		1	1	0	0	1	1	0	0	0	0	0	0	0	0	0	0	0	0	0	1	5	25
	Calcium Carbonate	20	30	20	10	20	8.16497	4.08248		Calcium Carbonate		1	1	0	0	0	1	0	0	0	0	0	0	0	0	0	0	0	1	0	0	4	20
	Zeolite	60	30	25	15	32.5	19.3649	9.68246		Zeolite		1	1	1	0	0	1	1	0	0	0	1	1	1	1	1	1	0	1	0	0	12	60
	Control	75	45	50	55	56.25	13.1498	6.57489		Control		1	1	0	0	1	1	1	1	1	1	1	1	1	1	1	0	0	1	1	0	15	75
										Kaolin	2	1	0	0	1	1	0	0	1	1	1	0	0	1	0	0	0	1	0	0	0	8	40
										Talc		0	0	0	1	0	0	1	1	1	0	0	1	0	1	0	0	0	1	0	0	7	35
										Zinc Oxide		0	0	1	0	0	0	1	0	1	1	0	0	0	1	0	0	0	0	0	0	5	25
										Bentonite		0	0	1	0	0	1	1	0	0	0	0	0	1	0	0	1	0	0	0	0	5	25
										Sulfur		0	0	0	0	1	0	0	0	1	0	0	1	0	0	0	1	0	0	1	0	5	25
										Dolomite		0	0	1	0	0	0	0	0	0	1	0	0	0	0	0	0	0	0	0	0	2	10
										Calcium Oxide		0	1	0	0	1	0	1	1	0	0	0	0	0	0	0	0	0	1	0	0	5	25
										Calcium Hydroxide		0	0	0	1	0	0	0	1	0	0	0	0	0	1	0	0	0	0	0	0	3	15
										Calcium Carbonate		0	0	1	1	1	1	1	0	0	0	0	0	1	0	0	0	0	0	0	0	6	30
										Zeolite		0	1	1	0	1	0	0	1	0	0	0	1	0	0	0	0	0	1	0	0	6	30
										Control		1	1	0	1	0	0	1	1	0	1	1	0	0	1	0	0	1	0	0	0	9	45
										Kaolin	3	1	1	1	0	1	0	1	0	0	1	0	0	0	1	0	0	1	0	0	0	8	40
										Talc		0	0	1	0	1	0	0	0	0	0	0	0	0	0	0	0	0	0	0	0	2	10
										Zinc Oxide		1	0	0	1	1	0	0	1	0	0	0	0	1	0	0	0	0	0	0	0	5	25
										Bentonite		0	0	1	0	0	0	0	1	0	1	0	1	0	0	0	0	0	0	0	0	4	20
										Sulfur		0	1	1	0	1	0	0	0	1	1	0	0	1	0	1	0	0	0	0	0	7	35
										Dolomite		0	0	0	1	1	1	0	0	0	0	0	0	1	0	1	0	0	0	0	0	5	25
										Calcium Oxide		0	0	1	0	1	0	0	0	1	0	0	0	0	0	0	0	0	0	0	0	3	15
										Calcium Hydroxide		0	0	1	1	0	0	0	0	0	0	1	0	0	0	0	0	0	0	0	0	3	15
										Calcium Carbonate		0	0	1	1	0	0	1	0	0	0	0	1	0	0	0	0	0	0	0	0	4	20
										Zeolite		0	0	1	0	0	1	1	0	0	0	0	1	0	0	1	0	0	0	0	0	5	25
										Control		1	0	1	1	0	1	0	0	1	1	0	1	1	0	0	1	0	0	0	1	10	50
										Kaolin	4	1	0	1	1	0	0	0	1	0	0	1	0	0	1	1	0	0	0	0	0	7	35
										Talc		0	1	0	1	0	0	0	0	0	0	1	0	0	0	1	1	0	1	0	0	6	30
										Zinc Oxide		1	0	0	1	0	0	0	0	0	1	1	1	0	0	0	0	1	0	0	0	6	30
										Bentonite		1	0	0	1	0	0	0	0	0	1	0	0	0	1	0	0	0	0	1	0	5	25
										Sulfur		0	0	0	0	1	0	0	0	1	0	0	0	1	0	1	0	1	1	0	0	6	30
										Dolomite		1	0	0	0	0	1	0	0	0	1	0	0	1	0	0	0	0	1	0	0	5	25
										Calcium Oxide		1	0	0	0	1	0	0	0	0	0	0	0	0	0	0	1	0	1	0	0	4	20
										Calcium Hydroxide		0	0	0	0	0	1	0	0	1	0	1	0	1	0	0	1	0	0	0	0	5	25
										Calcium Carbonate		1	0	0	0	0	1	0	0	0	0	0	0	0	0	0	0	0	0	0	0	2	10
										Zeolite		1	0	0	0	0	1	0	0	0	0	0	0	0	1	0	0	0	0	0	0	3	15
										Control		0	0	1	1	0	0	1	1	0	1	0	1	1	1	0	1	1	0	1	0	11	55
										* 1 : Chili fruit was infested by fruit fly
										0 : Chili fruit was not invested by fruit fly
