# Supplementary material for: The potency of minerals to reduce oriental fruit fly infestation in chili fruits
Source: PeerJ. 2022 Apr 14;10:e13198. doi: 10.7717/peerj.13198 (PMC9013478; doi:10.7717/peerj.13198)
Supplement: Supplemental Information 2 [file peerj-10-13198-s002.xlsx]

## Sheet: Laid Eggs
	Number of Fruit Fly Eggs in Chili Fruits
	Treatments	Laid Eggs							Reduction in Laid Eggs (%)		Treatments	Replication	Number of Fruit Fly Eggs in Each Chili Fruit																								Total Eggs
		Rep 1	Rep 2	Rep 3	Rep 4	Means	SD	SE					1	2	3	4	5	6	7	8	9	10	11	12	13	14	15	16	17	18	19	20	21	22	23	24
	Talc	99	134	126	104	115.75	16.8992	8.44961	39.159		Talc	1	0	0	24	0	0	29	0	38	0	2	0	6	0	0	0										99
	Calcium Oxide	27	90	65	95	69.25	31.0738	15.5369	63.6005		Calcium Oxide		0	0	0	0	0	0	0	21	0	0	2	4	0	0	0	0	0								27
	Calcium Hydroxide	44	73	47	85	62.25	19.9896	9.99479	67.2799		Calcium Hydroxide		0	0	0	24	12	0	0	0	8	0	0	0	0	0	0										44
	Calcium Carbonate	69	94	110	119	98	21.9241	10.9621	48.4888		Calcium Carbonate		0	28	0	0	0	3	0	2	0	24	0	12	0	0	0	0									69
	Deltamethrin	0	0	0	0	0	0	0	100		Deltamethrin		0	0	0	0	0	0	0	0	0	0	0	0	0	0	0	0									0
	Control	180	180	215	186	190.25	16.7407	8.37033	-		Control		0	82	0	23	14	3	8	38	12	0	0	0	0	0											180
											Talc	2	0	28	0	0	45	0	0	54	0	4	0	3	0	0											134
											Calcium Oxide		0	13	9	0	12	0	56	0	0	0	0	0													90
											Calcium Hydroxide		0	0	0	23	37	0	0	0	13	0	0														73
											Calcium Carbonate		0	21	0	32	0	0	21	0	0	8	12	0	0	0	0	0	0	0							94
											Deltamethrin		0	0	0	0	0	0	0	0	0	0	0	0	0	0	0	0	0	0							0
											Control		0	12	43	6	8	87	8	11	0	5	0														180
											Talc	3	0	21	0	0	29	0	32	0	44	0	0	0													126
											Calcium Oxide		0	0	0	8	0	12	0	0	0	0	0	0	45	0	0	0	0	0	0	0	0	0	0	0	65
											Calcium Hydroxide		0	0	0	0	0	0	0	0	23	0	0	24	0	0	0	0	0	0	0						47
											Calcium Carbonate		0	0	0	24	0	86	0	0	0	0	0	0	0	0	0	0									110
											Deltamethrin		0	0	0	0	0	0	0	0	0	0	0	0													0
											Control		0	6	7	0	9	24	0	45	0	56	12	0	54	0	2	0	0	0	0	0	0	0	0		215
											Talc	4	0	0	0	0	34	0	0	21	0	17	0	0	32	0											104
											Calcium Oxide		0	0	32	12	0	51	0	0	0	0	0	0	0	0	0										95
											Calcium Hydroxide		0	0	0	0	11	0	0	29	0	0	45	0	0	0	0	0	0	0	0						85
											Calcium Carbonate		0	17	0	0	23	0	0	34	0	0	0	45	0	0	0	0	0	0	0	0					119
											Deltamethrin		0	0	0	0	0	0	0	0	0	0	0	0	0	0	0	0	0								0
											Control		0	23	21	0	14	2	34	18	3	0	23	0	19	0	0	23	0	2	4	0					186

## Sheet: Infested Fruits
	Chili fruits infested by Fruit fly (%)
	Treatments	Infested Chili Fruits (%)							Reduction in Fruit Fly Infestation (%)		Treatments	Replication	Chili Fruits Infested by Fruit Fly *																								Infested Fruits	Total Fruits	% Infested Fruits
		Rep 1	Rep 2	Rep 3	Rep 4	Means	SD	SE					1	2	3	4	5	6	7	8	9	10	11	12	13	14	15	16	17	18	19	20	21	22	23	24
	Talc	33.3333	35.7143	33.3333	28.5714	32.7381	2.99597	1.49798	40.9742		Talc	1	0	0	1	0	0	1	0	1	0	1	0	1	0	0	0										5	15	33.3333
	Calcium Oxide	17.6471	33.3333	12.5	20	20.8701	8.87949	4.43974	62.3718		Calcium Oxide		0	0	0	0	0	0	0	1	0	0	1	1	0	0	0	0	0								3	17	17.6471
	Calcium Hydroxide	20	27.2727	10.5263	15.7895	18.3971	7.07331	3.53665	66.8305		Calcium Hydroxide		0	0	0	1	1	0	0	0	1	0	0	0	0	0	0										3	15	20
	Calcium Carbonate	31.25	27.7778	12.5	20	22.8819	8.36827	4.18414	58.7445		Calcium Carbonate		0	1	0	0	0	1	0	1	0	1	0	1	0	0	0	0									5	16	31.25
	Deltamethrin	0	0	0	0	0	0	0	100		Deltamethrin		0	0	0	0	0	0	0	0	0	0	0	0	0	0	0	0									0	16	0
	Control	50	72.7273	39.1304	60	55.4644	14.3206	7.16029	-0.000769648		Control		0	1	0	1	1	1	1	1	1	0	0	0	0	0											7	14	50
											Talc	2	0	1	0	0	1	0	0	1	0	1	0	1	0	0											5	14	35.7143
											Calcium Oxide		0	1	1	0	1	0	1	0	0	0	0	0													4	12	33.3333
											Calcium Hydroxide		0	0	0	1	1	0	0	0	1	0	0														3	11	27.2727
											Calcium Carbonate		0	1	0	1	0	0	1	0	0	1	1	0	0	0	0	0	0	0							5	18	27.7778
											Deltamethrin		0	0	0	0	0	0	0	0	0	0	0	0	0	0	0	0	0	0							0	18	0
											Control		0	1	1	1	1	1	1	1	0	1	0														8	11	72.7273
											Talc	3	0	1	0	0	1	0	1	0	1	0	0	0													4	12	33.3333
											Calcium Oxide		0	0	0	1	0	1	0	0	0	0	0	0	1	0	0	0	0	0	0	0	0	0	0	0	3	24	12.5
											Calcium Hydroxide		0	0	0	0	0	0	0	0	1	0	0	1	0	0	0	0	0	0	0						2	19	10.5263
											Calcium Carbonate		0	0	0	1	0	1	0	0	0	0	0	0	0	0	0	0									2	16	12.5
											Deltamethrin		0	0	0	0	0	0	0	0	0	0	0	0													0	12	0
											Control		0	1	1	0	1	1	0	1	0	1	1	0	1	0	1	0	0	0	0	0	0	0	0		9	23	39.1304
											Talc	4	0	0	0	0	1	0	0	1	0	1	0	0	1	0											4	14	28.5714
											Calcium Oxide		0	0	1	1	0	1	0	0	0	0	0	0	0	0	0										3	15	20
											Calcium Hydroxide		0	0	0	0	1	0	0	1	0	0	1	0	0	0	0	0	0	0	0						3	19	15.7895
											Calcium Carbonate		0	1	0	0	1	0	0	1	0	0	0	1	0	0	0	0	0	0	0	0					4	20	20
											Deltamethrin		0	0	0	0	0	0	0	0	0	0	0	0	0	0	0	0	0								0	17	0
											Control		0	1	1	0	1	1	1	1	1	0	1	0	1	0	0	1	0	1	1	0					12	20	60
											* 1 : Chili fruit was infested by fruit fly
											0 : Chili fruit was not invested by fruit fly
